# Supplementary material
Source: PubMed Central journal article supplement (PMC4679719)

**Supplemental figure 1. Heat map of transcripts differentially expressed between FACS sorted p75<sup>+</sup>/EGFR<sup>-</sup> Schwann cells and p75<sup>+</sup>/EGFR<sup>+</sup> SCP like tumor initiating cells**

Two-way hierarchical clustering grouped samples as p75<sup>+</sup>/EGFR<sup>-</sup> Schwann cells and p75<sup>+</sup>/EGFR<sup>+</sup> SCPs. P75<sup>+</sup>/EGFR<sup>+</sup> SCPs expression levels relative to p75<sup>+</sup>/EGFR<sup>-</sup> Schwann cells are identified. Genes with increased expression are shown in red. Genes with decreased expression are shown in blue.

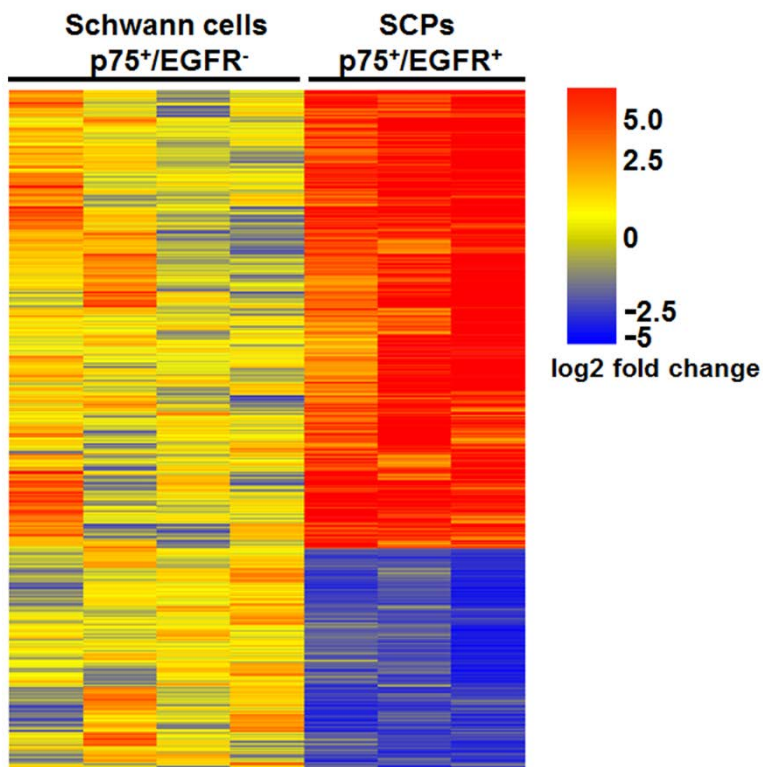

## Supplemental figure 2 Loss of Nf1 leads to increase in Runx1<sup>+</sup>/P0<sup>+</sup> progenitors in E12.5 DRGs

A. Immunofluorescence staining on E12.5 DRGs. Tissues were embedded in OCT and cut into 12-  $\mu\text{m}$  sections. Sections were incubated overnight at 4°C with antibodies: anti-Runx1 (Abcam) and anti- P0 (Abcam) and then were incubated with FITC-anti-mouse and TRITC-anti-rabbit secondary antibody at room temperature for 1 hours. Nuclei were stained with DAPI. Top: WT, Bottom: *Nf1*<sup>-/-</sup>, Red: P0, Green: Runx1, Blue: nuclei. White arrow: Runx1<sup>+</sup>/Blbp<sup>+</sup> progenitors. Arrow head: Runx1<sup>-</sup>/Blbp<sup>+</sup> progenitors. B.

Quantification on percentage of Runx1<sup>+</sup>/P0<sup>+</sup> progenitors in E12.5 WT (black bar) and E12.5 *Nf1*<sup>-/-</sup> DRGs (white bar). Statistical analyses were performed by unpaired, two-tailed student *t* test. \*\*\*= $p < 0.001$ .

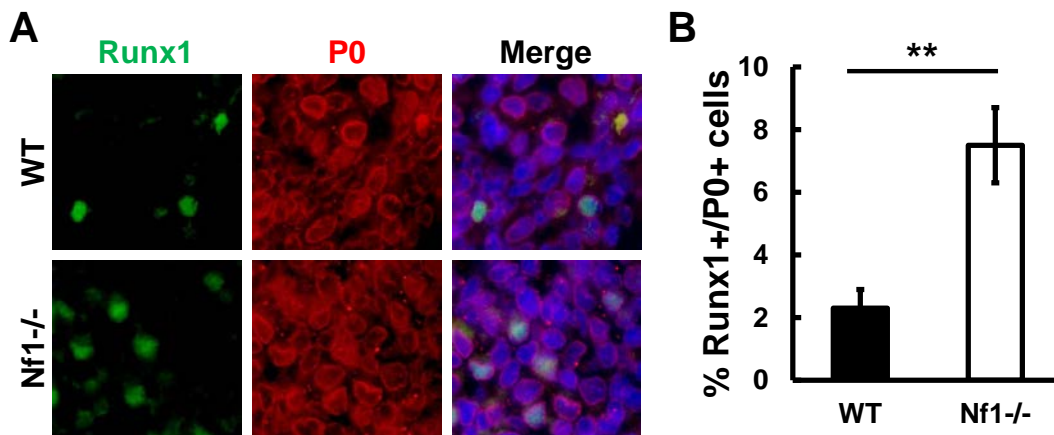

Supplement: NIHMS702353-supplement-Supplemental.pdf [file NIHMS702353-supplement-Supplemental.pdf]
